# Supplementary material for: Comparison of Communication Channels for Large-Scale Type 2 Diabetes Risk Screening and Intervention Recruitment: Empirical Study
Source: PubMed Central journal article supplement (PMC8461532; doi:10.2196/21356), 2021-09-09
Supplement: diabetes_v6i3e21356_app1.pdf [file diabetes_v6i3e21356_app1.pdf]

## StopDia Recruitment Campaign Communications Outputs & Reach

| Class                                 | Direct costs | Content                                                                                                | Geographical targeting  | Reach               | Engagement |
|---------------------------------------|--------------|--------------------------------------------------------------------------------------------------------|-------------------------|---------------------|------------|
| Television infospot                   | No           | Infospot at the national TV                                                                            | Finland                 | Potential 350 000   | N/A        |
| Television infospot                   | No           | Infospot at the national TV                                                                            | Finland                 | Potential 350 000   | N/A        |
| Total news, print and online          | No           | Interviews and news based on press releases total 5 (5 press releases)                                 | Campaign area           | N/A                 | N/A        |
| Total news, television and radio      | No           | Interviews and news based on press releases (2 local television interviews, 4 local radios interviews) | Campaign area           | N/A                 | N/A        |
| Advertisement                         | Yes          | Bus campaign                                                                                           | Päijät-Häme             |                     | N/A        |
| Event                                 | Yes          | Hosting the icehockey game                                                                             | North Savo              | N/A                 | N/A        |
| Advertisement, news                   | Yes          | Print newspaper ad: South-Karelia, in total two ads, in two regional newspapers                        | South Karelia           | Potential 84 000    | N/A        |
| Advertisement, news                   | Yes          | Online newspaper ad: Kaakon Viesti                                                                     | South Karelia           | Potential 10 000    | 150        |
| Total news, print and online          | No           | Interviews and news based on 5 press releases, total 122                                               | Campaign area & Finland | Potential 400 000   | N/A        |
| Total news, television and radio      | No           | Interviews and news based on press releases (2 local television, 4 local radio)                        | Campaign area           | N/A                 | N/A        |
| Public sector cooperation             | No           | Employees of the public sector in are area                                                             | North Savo              | 16 000              | N/A        |
| NGO and Healthcare cooperation        | No           | NGO and Healthcare campaing start                                                                      | Campaign area           | N/A                 | N/A        |
| E-mail pharmacies                     | No           | Pharmacy campaign start                                                                                | Campaign area           | N/A                 | N/A        |
| Newsletter to (600 people subscribed) | No           | Recruitment starts                                                                                     | Campaign area           | N/A                 | N/A        |
| SMS                                   | Yes          | SMS to people in RCT, ask your friend                                                                  | Campaign area           | 3000                | N/A        |
| Healthcare cooperation                | No           | Campaign to distribute flyer in healthcare                                                             | Campaign area           | N/A                 | N/A        |
| Total Youtube: Video                  | Yes          | Video, two separate videos                                                                             | Campaign area           | 673 439             | 160 714    |
| Total Google ads banner               | Yes          | Ad view, 5 different ads                                                                               | Campaign area           | 504 333             | 289        |
| Print materials total                 | Yes          | Flyers and poster, volume 150 000                                                                      | Campaign area           | N/A, volume 150 000 | N/A        |
| Facebook ads total                    | Yes          | Video, ad with a picture, promoted post, total adset 50                                                | Campaign area           | 617 925             | 18 574     |
| Facebook organic and viral            | No           | Posts by the Page regional groups, sharing to collagues from personal accounts                         | Campaign area           | N/A                 | N/A        |
| Private sector cooperation            | No           | Print materal distribution 80 companies contacted                                                      | Campaign area           | N/A                 | N/A        |

A summary of the main outputs during the campaing. The reach and engagement are not comparable, as different media has different metrics.

The recruitment took place in three areas: Päijät-Häme, South Karelia and North Savo. The outputs were targeted by default to all of them, labeled as Campaign area.

Activities were targeted geographically to only one area, if seen necessary. Some of the activities were not targeted, as the national news.
